# Supplementary material for: Interface Analysis of MOCVD Grown GeTe/Sb2Te3 and Ge-Rich Ge-Sb-Te/Sb2Te3 Core-Shell Nanowires
Source: MDPI journal article supplement (doi:10.3390/nano12101623), 2022-05-10
Supplement: s1 [file s1]

# Interface Analysis of MOCVD Grown GeTe/Sb<sub>2</sub>Te<sub>3</sub> and Ge-rich Ge-Sb-Te/Sb<sub>2</sub>Te<sub>3</sub> Core-shell Nanowires

Arun Kumar <sup>1,2,\*</sup>, Seyed Ariana Mirshokraee <sup>1,3</sup>, Alessio Lamperti <sup>1</sup>, Matteo Cantoni <sup>3</sup>, Massimo Longo <sup>4,\*</sup> and Claudia Wiemer <sup>1</sup>

<sup>1</sup> CNR—Institute for Microelectronics and Microsystems, Via C. Olivetti 2, 20864 Agrate Brianza, Italy; s.mirshokraee@campus.unimib.it (S.A.M.); alessio.lamperti@mdm.imm.cnr.it (A.L.); claudia.wiemer@mdm.imm.cnr.it (C.W.)

<sup>2</sup> Department of Physics ‘E.R. Caianiello’, University of Salerno, Via G. Paolo I 132, 84084 Salerno, Italy

<sup>3</sup> Department of Physics, Politecnico di Milano, Via G. Colombo 81, 20133 Milano, Italy; matteo.cantoni@polimi.it

<sup>4</sup> CNR—Institute for Microelectronics and Microsystems, Via del Fosso del Cavaliere 100, 00133 Rome, Italy

\* Correspondence: arun.kumar@mdm.imm.cnr.it (A.K.); massimo.longo@artov.imm.cnr.it (M.L.)

**Table S1.** Samples analyzed and their corresponding experimental XPS peak positions and FWHM.

| Sample                                            | Peaks     | Position (eV) | FWHM (eV) |
|---------------------------------------------------|-----------|---------------|-----------|
| Ge-rich Ge-Sb-Te                                  | Te 4d 3/2 | 40.320 ±0.1   | 1.034     |
|                                                   | Te 4d 1/2 | 41.910 ±0.1   | 0.894     |
|                                                   | Sb 4d 3/2 | 32.870 ±0.1   | 0.550     |
|                                                   | Sb 4d 1/2 | 34.100 ±0.1   | 0.935     |
|                                                   | Ge 3d     | 30.249 ±0.1   | 1.193     |
|                                                   | Ge 2p 3/2 | 1218.300 ±0.1 | 1.541     |
| Ge-rich Ge-Sb-Te/ Sb <sub>2</sub> Te <sub>3</sub> | Te 4d 3/2 | 40.270 ±0.1   | 1.090     |
|                                                   | Te 4d 1/2 | 41.650 ±0.1   | 0.960     |
|                                                   | Sb 4d 3/2 | 32.920 ±0.1   | 1.050     |
|                                                   | Sb 4d 1/2 | 34.150 ±0.1   | 0.700     |
|                                                   | Ge 2p 3/2 | 1219.300 ±0.1 | 3.540     |
| GeTe                                              | Te 4d 3/2 | 40.84 ±0.1    | 1.020     |
|                                                   | Te 4d 1/2 | 42.270 ±0.1   | 1.150     |
|                                                   | Ge 3d     | 30.235 ±0.1   | 1.140     |
|                                                   | Ge 2p 3/2 | 1218.188 ±0.1 | 1.519     |
| GeTe/ Sb <sub>2</sub> Te <sub>3</sub>             | Te 4d 3/2 | 40.140 ±0.1   | 0.930     |
|                                                   | Te 4d 1/2 | 41.590 ±0.1   | 1.180     |
|                                                   | Sb 4d 3/2 | 32.840 ±0.1   | 1.070     |
|                                                   | Sb 4d 1/2 | 34.090 ±0.1   | 0.830     |
|                                                   | Ge 2p 3/2 | 1218.430±0.1  | 2.060     |

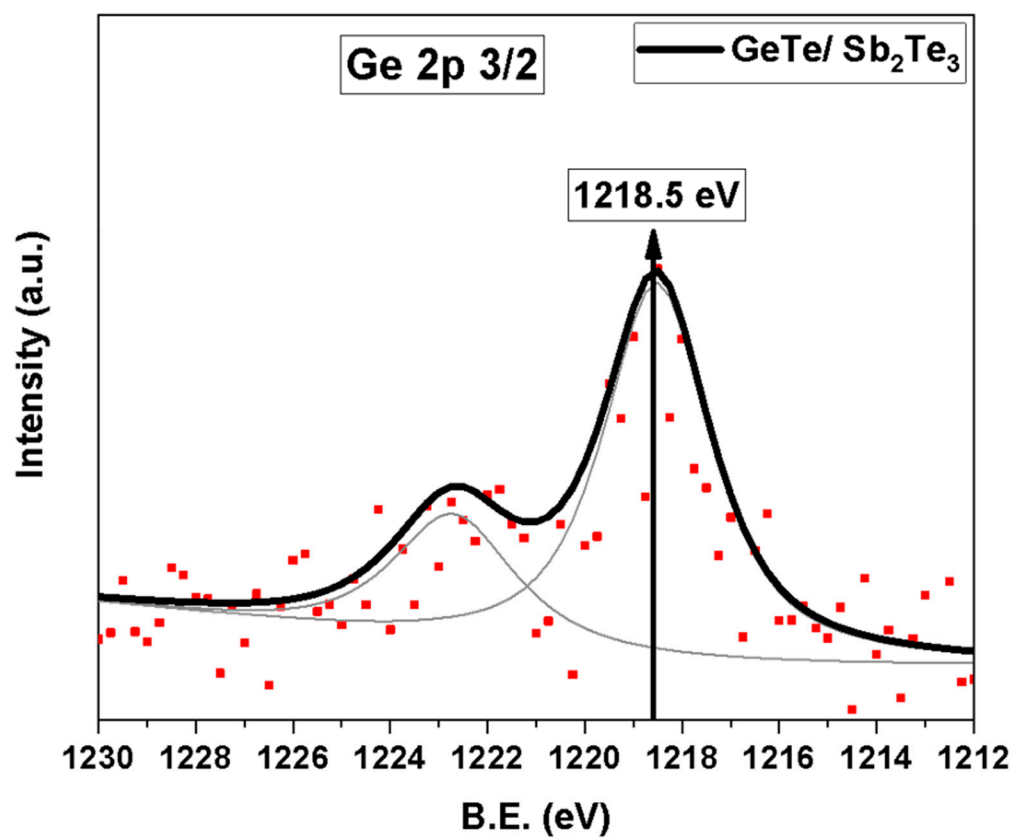

**Figure S1.** XPS spectra of Ge<sub>2p</sub> region for GT/ST core-shell with 10 nm shell thickness; (dots – experimental data, solid lines – fit).
